# Supplementary material for: Facile synthesis of Si/Ge/graphite@C composite with improved tap density and electrochemical performance
Source: Royal Society of Chemistry journal article supplement (doi:10.1039/d2ra06311e), 2022-12-21
Supplement: d2ra06311e1.pdf [file d2ra06311e1.pdf]

## Facile synthesis of Si/Ge/graphite@C composite with improved tap density and electrochemical performances

Ling Chang,<sup>a</sup> Yan Lin,<sup>b</sup> Kai Wang,<sup>\*a</sup> Ruiqiang Yan,<sup>a</sup> Wei Chen,<sup>a</sup> Zecong Zhao,<sup>a</sup> Yanping Yang,<sup>a</sup> Guobo Huang,<sup>\*a</sup> Wei Chen,<sup>c</sup> Jian Huang<sup>c</sup> and Youzhi Song<sup>\*d</sup>

<sup>a</sup> School of Pharmaceutical and Chemical Engineering, Taizhou University, Taizhou 318000, China

<sup>b</sup> Zhejiang Provincial Key Laboratory for Cutting Tools, Taizhou University, Taizhou 318000, China

<sup>c</sup> ERA Co., Ltd., Taizhou 318000, China

<sup>d</sup> Key Laboratory of Macromolecular Synthesis and Functionalization (Ministry of Education), International Research Central for Functional Polymers, Department of Polymer Science and Engineering, Zhejiang University, Hangzhou 310027, China

\* Correspondence: [wangkai0914@zju.edu.cn](mailto:wangkai0914@zju.edu.cn) (K.W.); [513493405@qq.com](mailto:513493405@qq.com) (G.B.H.); Youzhi Song, [syouzhi@zju.edu.cn](mailto:syouzhi@zju.edu.cn) (Y.Z.S.).

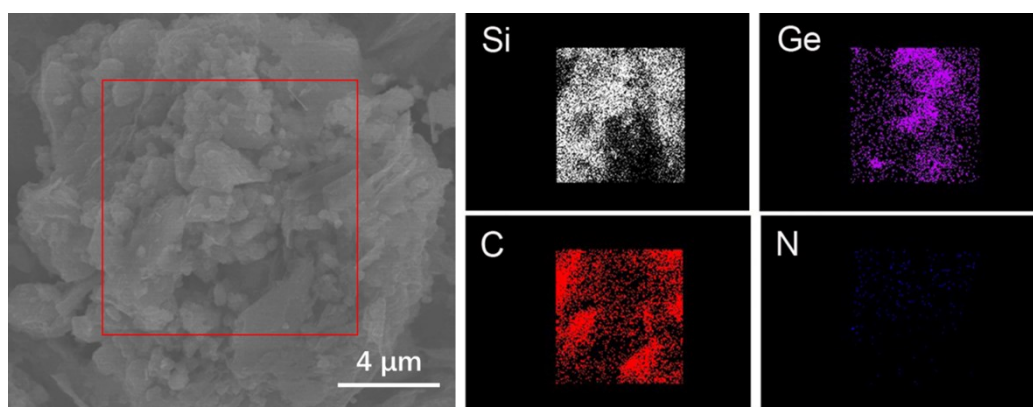

Fig. S1 Elemental mapping images of Si/Ge/G@C composite.

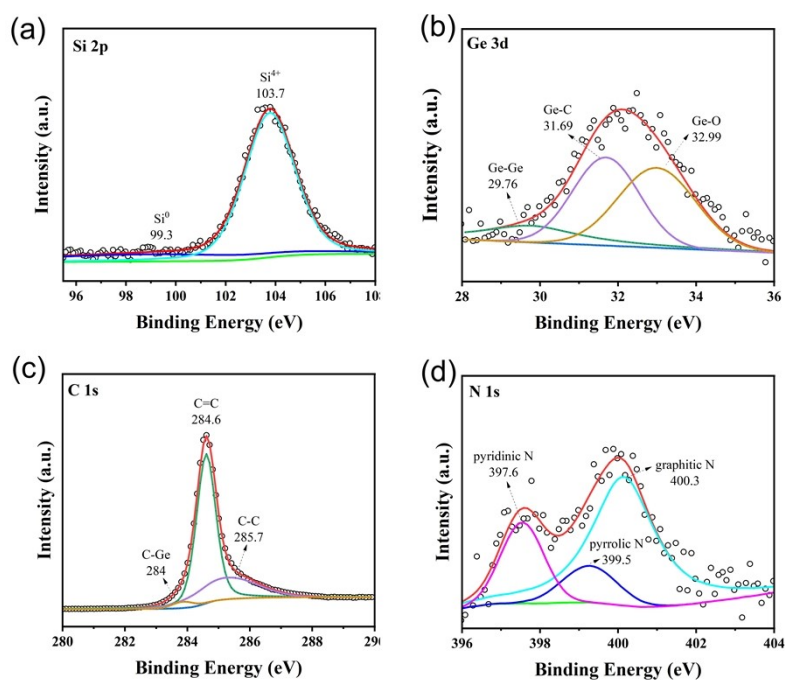

Fig. S2 High-resolution XPS spectra of (a) Si 2p, (b) Ge 3d, (c) C 1s and (d) N 1s for the Si/Ge/G@C composite.

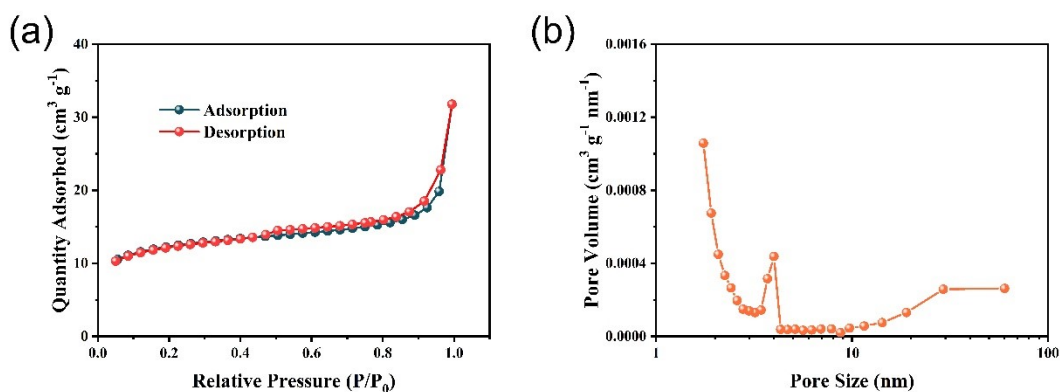

Fig. S3 Nitrogen adsorption-desorption isotherms (a) and pore-structure (b) of the Si/Ge/graphite@C composite.

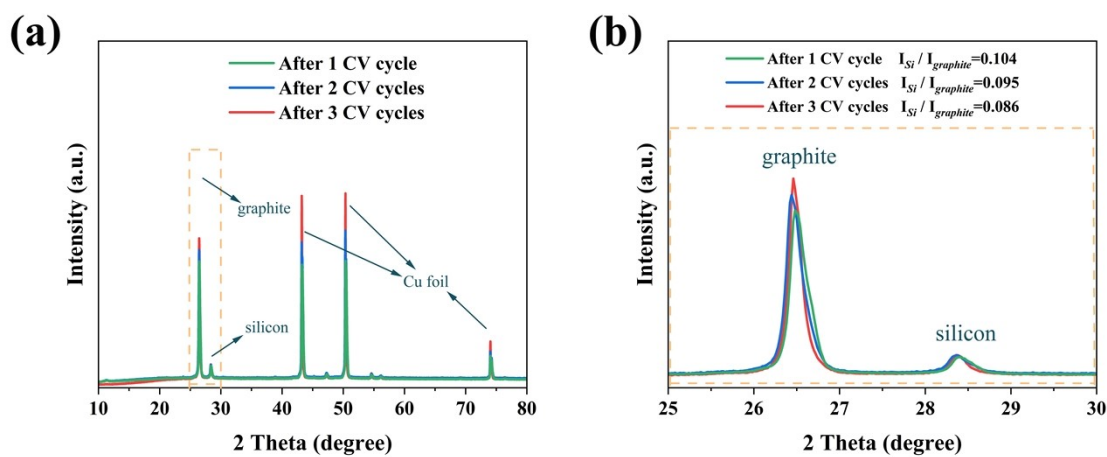

Fig. S4 (a) Ex-situ XRD of the Si/Ge/graphite@C electrodes after different CV cycles. (b) Magnified patterns of the dashed box in (a).

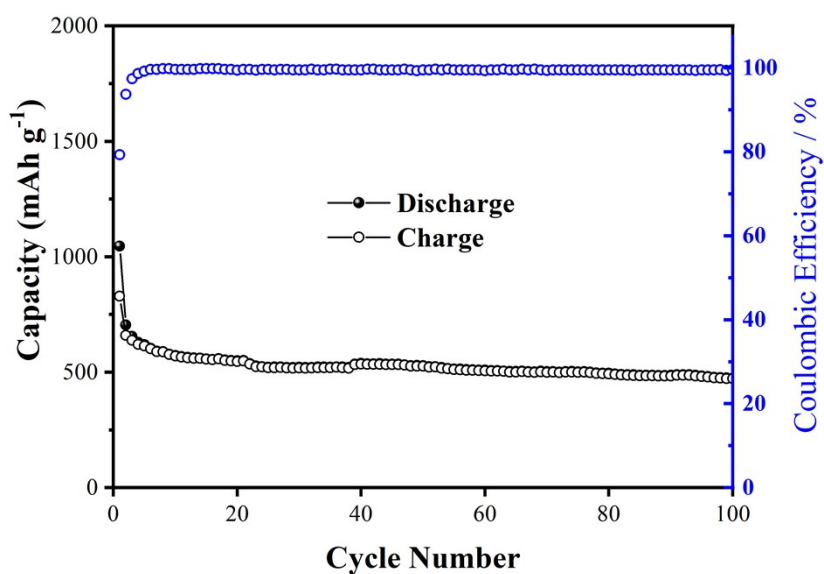

Fig. S5 Charge/discharge performance and coulombic efficiency of the Si/Ge/graphite@C composite at  $0.2 \text{ A g}^{-1}$ .

**Table S1** Comparison of electrochemical properties of Si-based anodes

| Materials             | Current density<br>(mA g <sup>-1</sup> ) | Cycle number | Discharge<br>capacity (mAh g <sup>-1</sup> ) | reference |
|-----------------------|------------------------------------------|--------------|----------------------------------------------|-----------|
| T-SGT/Si@C            | 500                                      | 300          | 434.4                                        | [1]       |
| Si-C/G-A              | 500                                      | 200          | 435                                          | [2]       |
| Si/Graphite           | 1000                                     | 400          | 522.4                                        | [3]       |
| Si/Ge/G@C             | 100                                      | 100          | 706.0                                        | [4]       |
| Si@C@TiO <sub>2</sub> | 350                                      | 420          | 393.8                                        | [5]       |
| nano-Si/G/C           | 1000                                     | 500          | 368                                          | [6]       |
| Si-C-NG               | 100                                      | 100          | 471.5                                        | [7]       |
| Si/Ge/graphite@C      | 200                                      | 100          | 474                                          | This work |

## References

- [1] D. S. Ruan, L. Wu, F. M. Wang, K. Du, Z. H. Zhang, K. Zou, X. F. Wu and G. R. Hu, *J. Electroanal. Chem.*, 2021, **884**, 115073.
- [2] J. F. Gao, S. L. Zuo, H. Liu, Q. W. Jiang, C. H. Wang, H. H. Yin, Z. Q. Wang and J. Wang, *J. Colloid Interf. Sci.*, 2022, **624**, 555-563.
- [3] M. X. Chen, W. Y. Cao, L. C. Wang, X. Ma and K. Han, *ACS Appl. Energy Mater.*, 2021, **4**, 775-783.
- [4] Z. X. Li, K. K. Zhang, M. X. Ma, Y. J. Zhang, H. Feng, P. F. Cao, S. L. Gao and H. B. Yang, *Silicon-Neth.*, 2022, doi.org/10.1007/s12633-022-02143-2.
- [5] Y. T. Yan, X. L. Zhao, H. L. Dou, J. J. Wei, W. Y. Zhao, Z. H. Sun and X. W. Yang, *Chinese Chem. Lett.*, 2021, **32**, 910-913.
- [6] A. T. Sun, H. Zhong, X. Y. Zhou, J. J. Tang, M. Jia, F. Y. Cheng, Q. Wang and J. Yang, *Appl. Surf. Sci.*, 2019, **470**, 454-461.
- [7] A. N. Wang, F. D. Liu, Z. L. Wang and X. Liu, *RSC Adv.*, 2016, **6**, 104995.
